# Supplementary material for: Long-term Incidence Rates of Esophageal Squamous Cell Carcinoma in Chinese Patients With Low-grade Intraepithelial Neoplasia and Association of Surveillance Endoscopy With Incidence
Source: PubMed Central journal article supplement (PMC9856485; doi:10.1001/jamanetworkopen.2022.47415), 2022-12-19
Supplement: jamanetwopen-e2247415-s001.pdf [file jamanetwopen-e2247415-s001.pdf]

## Supplementary Online Content

Li H, Wu H, Cao M, et al. Long-term incidence rates of esophageal squamous cell carcinoma in Chinese patients with low-grade intraepithelial neoplasia and association of surveillance endoscopy with incidence. *JAMA Netw Open*. 2022;5(12):e2247415. doi:10.1001/jamanetworkopen.2022.47415

**eTable 1.** Characteristics of Esophageal Squamous Cell Carcinoma (ESCC) Patients According to Surveillance Endoscopy

**eTable 2.** Risk of Esophageal Squamous Cell Carcinoma (ESCC) in Patients With Severe Dysplasia/Carcinoma In Situ Diagnosed by Surveillance Endoscopy, Compared With Treatment (No or Yes)

**eTable 3.** Adjusted Risk of Progression to Esophageal Squamous Cell Carcinoma (ESCC) in Patients With Low-grade Intraepithelial Neoplasia Over a Median Follow-up Period of 7.96 Years, Adjusted by Surveillance Endoscopy Visits and Surveillance Interval

**eTable 4.** Sensitivity Analysis of the Association Between Surveillance Endoscopy and the Incidence of ESCC

This supplementary material has been provided by the authors to give readers additional information about their work.

**eTable 1.** Characteristics of esophageal squamous cell carcinoma (ESCC) patients according to surveillance endoscopy

| Characteristics                    | ESCC patients in the non-surveillance group, n (%) | ESCC patients in the surveillance group, n (%) | P value |
|------------------------------------|----------------------------------------------------|------------------------------------------------|---------|
| <b>Gender</b>                      |                                                    |                                                | 0.33    |
| Male                               | 74 (65.49)                                         | 33 (57.89)                                     |         |
| Female                             | 39 (34.51)                                         | 24 (42.11)                                     |         |
| <b>Age at diagnosis, years</b>     |                                                    |                                                | <0.001  |
| mean ± SD                          | 62.80 (7.02)                                       | 64.59 (5.85)                                   |         |
| <b>Tumor stage*</b>                |                                                    |                                                | 0.007   |
| 0/I/II                             | 28 (49.12)                                         | 21 (80.77)                                     |         |
| III/IV                             | 29 (50.88)                                         | 5 (19.23)                                      |         |
| <b>Treatment†</b>                  |                                                    |                                                | 0.007   |
| No treatment                       | 6 (9.52)                                           | 2 (5.56)                                       |         |
| ESD/EMR                            | 9 (14.29)                                          | 16 (44.44)                                     |         |
| Surgery                            | 22 (34.93)                                         | 11 (30.55)                                     |         |
| Chemotherapy/Radiotherapy          | 13 (20.63)                                         | 1 (2.78)                                       |         |
| Surgery+ Chemotherapy/Radiotherapy | 13 (20.63)                                         | 6 (16.67)                                      |         |

Note: \* 87 ESCC cases without information on histological stage: 56 in the non-surveillance group and 31 in the surveillance group. †71 ESCC cases without information on treatment: 50 in the non-surveillance group and 21 in the surveillance group. Abbreviations: EMR, endoscopic mucosal resection; ESCC, esophageal squamous cell carcinoma; ESD, endoscopic submucosal dissection.

**eTable 2.** Risk of esophageal squamous cell carcinoma (ESCC) in patients with severe dysplasia/ carcinoma in situ diagnosed by surveillance endoscopy, compared with treatment (no or yes)

| Treatment | No. of patients of severe dysplasia/ carcinoma in situ diagnosed by surveillance | No. of ESCC cases | Incidence rate per 1000 PYs | Univariate HR (95% CI) | Multivariable HR* (95% CI) |
|-----------|----------------------------------------------------------------------------------|-------------------|-----------------------------|------------------------|----------------------------|
| No        | 12                                                                               | 5                 | 49.79                       |                        |                            |
| Yes       | 44                                                                               | 3                 | 7.39                        | 0.15 (0.04-0.63)       | 0.12 (0.02-0.89)           |

\* Variables of sex, age, education status, family history of esophageal cancer, cigarette smoking, alcohol consumption were adjusted.

Abbreviations: CI, confidence interval; ESCC, esophageal squamous cell carcinoma; HR, hazard ratio; PYs, person-years.

**eTable 3.** Adjusted risk of progression to esophageal squamous cell carcinoma (ESCC) in patients with low-grade intraepithelial neoplasia over a median follow-up period of 7.96 years, adjusted by surveillance endoscopy visits and surveillance interval

| Variable                                                     | No. of patients of LGIN, n (%) | Person years | No. of ESCC cases | Univariate HR (95% CI) | P value | Multivariable HR (95% CI) | P value |
|--------------------------------------------------------------|--------------------------------|--------------|-------------------|------------------------|---------|---------------------------|---------|
| No. of surveillance endoscopy visits                         |                                |              |                   |                        |         |                           |         |
| 0                                                            | 1880 (57.70)                   | 15992.97     | 113               | referent               |         | referent                  |         |
| 1                                                            | 1079 (33.12)                   | 8378.43      | 37                | 0.61 (0.42-0.88)       | 0.009   | 0.60 (0.41-0.87)          | 0.007   |
| 2                                                            | 231 (7.09)                     | 2083.45      | 14                | 0.95 (0.55-1.66)       | 0.87    | 0.88 (0.50-1.54)          | 0.66    |
| ≥3                                                           | 68 (2.09)                      | 626.41       | 6                 | 1.37 (0.60-3.11)       | 0.45    | 1.27 (0.56-2.90)          | 0.57    |
| Surveillance endoscopy according to the recommended interval |                                |              |                   |                        |         |                           |         |
| No surveillance                                              | 1880 (57.70)                   | 15992.97     | 113               | referent               |         | referent                  |         |
| Surveillance within the recommended interval                 | 934 (28.67)                    | 15992.97     | 33                | 0.66 (0.45-0.97)       | 0.04    | 0.62 (0.42-0.92)          | 0.02    |
| Surveillance outside of the recommended interval             | 444 (13.63)                    | 10479.61     | 24                | 0.81 (0.52-1.26)       | 0.34    | 0.81 (0.52-1.26)          | 0.35    |

Abbreviations: CI, confidence interval; ESCC, esophageal squamous cell carcinoma; HR, hazard ratio; LGIN, low-grade intraepithelial neoplasia.

**eTable 4:** Sensitivity analysis of the association between surveillance endoscopy and the incidence of ESCC

| Models                                      | No. of patients of LGIN, n | Person years | No. of ESCC cases | Multivariable HR (95% CI) | P value |
|---------------------------------------------|----------------------------|--------------|-------------------|---------------------------|---------|
| Main analysis                               | 3258                       | 27081.26     | 170               | 0.69 (0.50-0.95)          | 0.02    |
| Multiple imputation                         | 3303                       | 27536.68     | 171               | 0.69 (0.62-0.76)          | <0.001  |
| Exclusion participants enrolled before 2012 | 2071                       | 14016.78     | 78                | 0.60 (0.38-0.96)          | 0.03    |

Abbreviations: CI, confidence interval; ESCC, esophageal squamous cell carcinoma; HR, hazard ratio; LGIN, low-grade intraepithelial neoplasia.
