# Supplementary material for: Long-term Incidence Rates of Esophageal Squamous Cell Carcinoma in Chinese Patients With Low-grade Intraepithelial Neoplasia and Association of Surveillance Endoscopy With Incidence
Source: PubMed Central journal article supplement (PMC9856485; doi:10.1001/jamanetworkopen.2022.47415), 2022-12-19
Supplement: jamanetwopen-e2247415-s002.pdf [file jamanetwopen-e2247415-s002.pdf]

## Data Sharing Statement

Li. Long-term Incidence Rates of Esophageal Squamous Cell Carcinoma in Chinese Patients With Low-Grade Intraepithelial Neoplasia and Association of Surveillance Endoscopy With Incidence. *JAMA Netw Open*. Published December 19, 2022.  
doi:10.1001/jamanetworkopen.2022.47415

### Data

**Data available:**Data are available upon reasonable request. Data from the study are available upon request from the corresponding author.
